# Supplementary material for: Mucuna pruriens in Parkinson disease: A double-blind, randomized, controlled, crossover study
Source: PubMed Central journal article supplement — Neurology. 2017 Aug 1;89(5):432–8. doi: 10.1212/WNL.0000000000004175 (PMC5539737; doi:10.1212/wnl.0000000000004175), 2017-08-01

**Figure e-1.** All treatment arms had been presented to patients with similar colour and flavour.

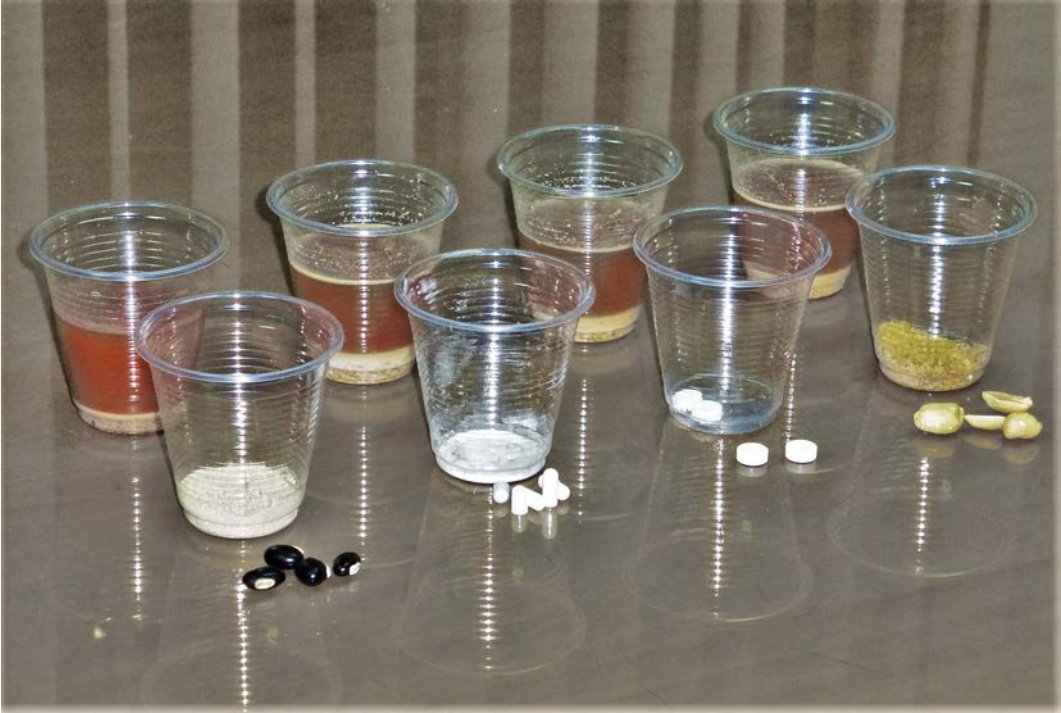

**Figure e-2.** Levodopa plasma pharmacokinetic measures in four Italian PD patients.

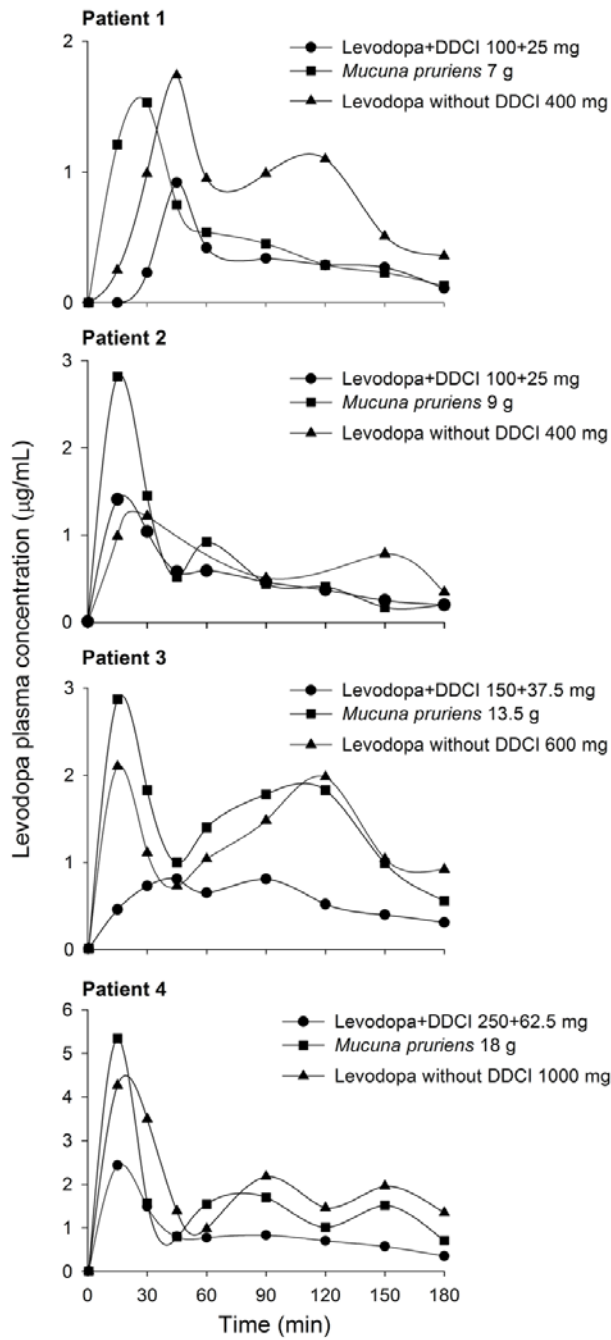

Supplement: supp_WNL.0000000000004175_e-figures.pdf [file supp_WNL.0000000000004175_e-figures.pdf]
