# Supplementary material for: Mucuna pruriens in Parkinson disease: A double-blind, randomized, controlled, crossover study
Source: PubMed Central journal article supplement — Neurology. 2017 Aug 1;89(5):432–8. doi: 10.1212/WNL.0000000000004175 (PMC5539737; doi:10.1212/wnl.0000000000004175), 2017-08-01
Supplement: supp_WNL.0000000000004175_e-tables.pdf [file supp_WNL.0000000000004175_e-tables.pdf]

**Table e-1.** Baseline characteristics and random allocation to treatment.

| Pt No. | Baseline characteristics |          |                  |                     |                                     |                 |                 |                                                        |                                    | Randomised treatment allocation |       |       |       |       |       |
|--------|--------------------------|----------|------------------|---------------------|-------------------------------------|-----------------|-----------------|--------------------------------------------------------|------------------------------------|---------------------------------|-------|-------|-------|-------|-------|
|        | Gender                   | Age (ys) | Body weight (kg) | Duration of PD (ys) | Duration of motor fluctuations (ys) | UPDRS-III (OFF) | H&Y stage (OFF) | Levodopa dose weight-adjusted <sup>a</sup> (mg/kg/day) | Total LEDD <sup>a,b</sup> (mg/day) | Day 1                           | Day 2 | Day 3 | Day 4 | Day 5 | Day 6 |
| 1      | M                        | 61       | 52               | 9                   | 5                                   | 61              | 4               | 34.3                                                   | 1783                               | D                               | B     | C     | E     | A     | F     |
| 2      | M                        | 66       | 70               | 14                  | 7                                   | 51              | 3               | 10.7                                                   | 750                                | B                               | A     | F     | D     | C     | E     |
| 3      | M                        | 55       | 80               | 9                   | 6                                   | 36              | 2.5             | 49.0                                                   | 3920                               | A                               | F     | D     | B     | E     | C     |
| 4      | F                        | 61       | 66               | 14                  | 5                                   | 33              | 2.5             | 18.6                                                   | 1530                               | C                               | E     | A     | F     | D     | B     |
| 5      | M                        | 68       | 84               | 14                  | 10                                  | 29              | 2               | 39.5                                                   | 3315                               | F                               | A     | E     | B     | C     | D     |
| 6      | M                        | 52       | 94               | 7                   | 3                                   | 33              | 2               | 4.0                                                    | 675                                | D                               | C     | F     | E     | B     | A     |
| 7      | M                        | 67       | 76               | 8                   | 5                                   | 30              | 4               | 13.2                                                   | 1000                               | E                               | F     | B     | A     | C     | D     |
| 8      | F                        | 68       | 54               | 17                  | 15                                  | 51              | 3               | 18.5                                                   | 1000                               | A                               | C     | B     | D     | E     | F     |
| 9      | M                        | 49       | 85               | 8                   | 6                                   | 51              | 2.5             | 13.2                                                   | 1425                               | B                               | D     | C     | F     | A     | E     |
| 10     | F                        | 74       | 47               | 9                   | 4                                   | 36              | 2.5             | 11.5                                                   | 750                                | E                               | B     | D     | A     | F     | C     |
| 11     | M                        | 53       | 96               | 10                  | 3                                   | 33              | 2.5             | 15.6                                                   | 1800                               | A                               | D     | C     | B     | E     | F     |
| 12     | M                        | 65       | 74               | 7                   | 2                                   | 44              | 2               | 15.2                                                   | 1125                               | F                               | C     | E     | D     | B     | A     |
| 13     | M                        | 79       | 49               | 6                   | 4                                   | 20              | 2               | 23.0                                                   | 1125                               | B                               | D     | F     | C     | E     | A     |
| 14     | M                        | 53       | 79               | 10                  | 7                                   | 38              | 2.5             | 18.4                                                   | 1450                               | A                               | C     | E     | D     | F     | B     |
| 15     | M                        | 45       | 68               | 9                   | 3                                   | 42              | 2.5             | 14.8                                                   | 1000                               | D                               | E     | A     | F     | B     | C     |
| 16     | F                        | 67       | 66               | 8                   | 2                                   | 40              | 3               | 21.4                                                   | 1425                               | C                               | B     | D     | A     | F     | E     |
| 17     | F                        | 69       | 66               | 7                   | 4                                   | 22              | 2.5             | 15.8                                                   | 1050                               | E                               | F     | B     | C     | A     | D     |
| 18     | M                        | 61       | 111              | 10                  | 6                                   | 30              | 2               | 9.9                                                    | 1100                               | C                               | E     | A     | F     | D     | B     |

*Abbreviations:* **H&Y**, Hoehn and Yahr stage; **LEDD**, Levodopa equivalent daily dose; **UPDRS-III**, Unified PD Rating Scale motor score; **PD**, Parkinson's disease.

<sup>a</sup>Including Levodopa/DDCI and Levodopa contained in *Mucuna pruriens*.

<sup>b</sup>Levodopa/DDCI + Levodopa contained in *Mucuna pruriens* + DA agonist daily dose in LEDD (Tomlinson et al., 2010).

**Table e-2.** Motor response according to the treatment arm.

| Features                               | Treatment Arm |            |            |            |           |         | Statistical Analysis (P-value) <sup>a</sup> |                  |              |                  |                |                  |                |                |                  |                  |
|----------------------------------------|---------------|------------|------------|------------|-----------|---------|---------------------------------------------|------------------|--------------|------------------|----------------|------------------|----------------|----------------|------------------|------------------|
|                                        | LD+DDCI       | MP-Hd      | MP-Ld      | LD-DDCI    | MP+DDCI   | Placebo | MP High-dose                                |                  |              |                  | MP Low-dose    |                  |                | MP+DDCI        |                  | LD-DDCI          |
|                                        |               |            |            |            |           |         | vs.<br>LD+DDCI                              | vs.<br>LD-DDCI   | vs.<br>MP-Ld | vs.<br>MP+DDCI   | vs.<br>LD+DDCI | vs.<br>LD-DDCI   | vs.<br>MP+DDCI | vs.<br>LD+DDCI | vs.<br>LD-DDCI   | vs.<br>LD+DDCI   |
| <b>Levodopa Ratio</b>                  | 1 (reference) | 5 : 1      | 3.5 : 1    | 5 : 1      | 1 : 1     | 0 : 1   | -                                           | -                | -            | -                | -              | -                | -              | -              | -                | -                |
| <b>Levodopa dose (mg) <sup>b</sup></b> | 258 (52)      | 1311 (261) | 917 (199)  | 1317 (263) | 267 (61)  | 0       | -                                           | -                | -            | -                | -              | -                | -              | -              | -                | -                |
| <b>Levodopa (mg/kg) <sup>b</sup></b>   | 3.5 (0.2)     | 17.6 (1.1) | 12.4 (0.9) | 17.7 (1.1) | 3.6 (0.2) | 0       | -                                           | -                | -            | -                | -              | -                | -              | -              | -                | -                |
| <b>MP dose (g)</b>                     | -             | 23.2 (4.9) | 16.1 (3.7) | -          | 4.7 (1.1) | 0       | -                                           | -                | -            | -                | -              | -                | -              | -              | -                | -                |
| <b>Latency to Full ON (min)</b>        | 27 (13)       | 18 (5)     | 22 (11)    | 24 (11)    | 23 (5)    | -       | <b>0.008</b>                                | <b>0.042</b>     | <i>0.092</i> | <i>0.085</i>     | 0.226          | 0.671            | 0.638          | 0.526          | 0.651            | 0.300            |
| <b>ON Duration <sup>c</sup> (min)</b>  | 177 (36)      | 221 (32)   | 195 (41)   | 272 (44)   | 139 (37)  | -       | <b>&lt;0.001</b>                            | <b>&lt;0.001</b> | <b>0.022</b> | <b>&lt;0.001</b> | 0.154          | <b>&lt;0.001</b> | <b>0.015</b>   | <b>0.046</b>   | <b>&lt;0.001</b> | <b>&lt;0.001</b> |
| <b>UPDRS part III</b>                  |               |            |            |            |           |         |                                             |                  |              |                  |                |                  |                |                |                  |                  |
| OFF                                    | 38 (11)       | 37 (11)    | 38 (13)    | 38 (11)    | 40 (9)    | 39 (9)  | 0.586                                       | 0.372            | 0.612        | 0.784            | 0.853          | 0.757            | 0.498          | 0.497          | 0.497            | 0.649            |
| ON at 90'                              | 14 (7)        | 12 (8)     | 13 (7)     | 14 (8)     | 14 (8)    | 36 (7)  | <b>0.037</b>                                | <i>0.061</i>     | 0.296        | 0.128            | 0.421          | 0.173            | 0.228          | 0.483          | 0.372            | 0.439            |
| ON at 180'                             | 26 (16)       | 15 (11)    | 19 (10)    | 16 (10)    | 35 (12)   | 38 (9)  | <b>0.002</b>                                | 0.538            | <i>0.077</i> | <b>0.001</b>     | <i>0.096</i>   | 0.301            | <b>0.005</b>   | 0.313          | <b>&lt;0.001</b> | <b>0.006</b>     |
| Change 90' vs. OFF (%)                 | 62 (19)       | 67 (19)    | 63 (20)    | 60 (21)    | 65 (19)   | 7 (5)   | <b>0.014</b>                                | <b>0.045</b>     | 0.273        | <i>0.094</i>     | 0.649          | 0.174            | 0.158          | 0.480          | 0.340            | 0.525            |
| Change 180' vs. OFF (%)                | 31 (33)       | 60 (27)    | 47 (25)    | 59 (21)    | 16 (21)   | 3 (3)   | <b>0.001</b>                                | 0.769            | <i>0.058</i> | <b>&lt;0.001</b> | 0.103          | 0.123            | <b>0.004</b>   | 0.255          | <b>&lt;0.001</b> | <b>0.005</b>     |
| Wearing-Off index (%) <sup>d</sup>     | 32 (30)       | 7 (13)     | 16 (24)    | 2 (11)     | 50 (26)   | 4 (3)   | <b>0.007</b>                                | 0.183            | 0.183        | <b>0.001</b>     | <i>0.089</i>   | <b>0.038</b>     | <b>0.017</b>   | 0.376          | <b>&lt;0.001</b> | <b>0.001</b>     |
| <b>Involuntary Movements</b>           |               |            |            |            |           |         |                                             |                  |              |                  |                |                  |                |                |                  |                  |
| AIMS at 90'                            | 5.6 (4.0)     | 3.9 (2.7)  | 2.8 (1.7)  | 4.0 (3.5)  | 3.7 (3.2) | 0 (0)   | <b>0.021</b>                                | 0.909            | <i>0.067</i> | 0.928            | <b>0.010</b>   | 0.133            | 0.403          | 0.238          | 0.888            | <i>0.085</i>     |
| AIMS at 180'                           | 2.0 (3.0)     | 2.9 (2.0)  | 3.8 (2.7)  | 3.1 (2.5)  | 0.4 (1.1) | 0 (0)   | 0.314                                       | 0.591            | 0.461        | <b>0.009</b>     | 0.920          | 0.389            | 0.192          | 0.251          | <b>0.008</b>     | 0.258            |

Abbreviations: **AIMS**, Abnormal Involuntary Movements Scale, **LD +/- DDCI**, levodopa with/without the dopa-decarboxylase inhibitor Benserazide; **Hd**, high dose; **Ld**, low dose; **LD**, Levodopa, **min**, minutes; **MP**, Mucuna pruriens; **UPDRS**, Unified Parkinson Disease rating Scale.

Significant results (p<0.05) in **bold**, trend to significance (p<0.1) in *italics*.

<sup>a</sup> p-values according to paired t-test. Data versus placebo are not shown.

<sup>b</sup> Levodopa content in Mucuna preparation is calculated as 5.7% of weight.

<sup>c</sup> Defined as duration from full ON state to the OFF state.

<sup>d</sup> Defined as relative worsening of motor performance at 180' compared to 90'; calculated as: (UPDRS III at 180' – UPDRS III at 90') / UPDRS III in the OFF state)\*100.

**Table e-3.** Cardiovascular response to interventions.

|                                                     | Treatment Arm * |          |          |          |          |                       |
|-----------------------------------------------------|-----------------|----------|----------|----------|----------|-----------------------|
|                                                     | LD+DDCI         | MP-Hd    | MP-Ld    | LD-DDCI  | MP+DDCI  | Placebo               |
| <b>OFF</b>                                          |                 |          |          |          |          |                       |
| <b>Supine</b>                                       |                 |          |          |          |          |                       |
| Systolic BP, mmHg                                   | 138 (17)        | 137 (15) | 137 (13) | 140 (17) | 133 (19) | 136 (13)              |
| Diastolic BP, mmHg                                  | 81 (8)          | 83 (8)   | 83 (8)   | 85 (10)  | 80 (10)  | 78 (7)                |
| Mean BP value, mmHg                                 | 100 (9)         | 101 (8)  | 101 (8)  | 103 (11) | 100 (12) | 101 (8)               |
| Heart Rate, bpm                                     | 81 (14)         | 78 (13)  | 83 (16)  | 82 (14)  | 81 (14)  | 84 (14)               |
| <b>Standing</b>                                     |                 |          |          |          |          |                       |
| Systolic BP, mmHg                                   | 135 (16)        | 131 (18) | 135 (13) | 133 (14) | 131 (10) | 136 (16)              |
| Diastolic BP, mmHg                                  | 84 (8)          | 82 (7)   | 83 (9)   | 82 (12)  | 81 (10)  | 83 (8)                |
| Mean BP, mmHg                                       | 101 (9)         | 98 (9)   | 100 (10) | 100 (11) | 99 (12)  | 101 (10)              |
| Heart Rate, bpm                                     | 84 (14)         | 81 (14)  | 85 (16)  | 85 (14)  | 83 (14)  | 86 (14)               |
| <b>ON 90 minutes</b>                                |                 |          |          |          |          |                       |
| <b>Supine</b>                                       |                 |          |          |          |          |                       |
| Systolic BP, mmHg                                   | 112 (13)        | 113 (10) | 115 (10) | 119 (16) | 116 (12) | 139 (16) <sup>b</sup> |
| Diastolic BP, mmHg                                  | 66 (8)          | 68 (7)   | 69 (8)   | 72 (10)  | 70 (9)   | 79 (8) <sup>b</sup>   |
| Mean BP, mmHg                                       | 82 (9)          | 83 (7)   | 84 (8)   | 88 (12)  | 85 (9)   | 99 (9) <sup>b</sup>   |
| Heart Rate, bpm                                     | 74 (7)          | 78 (11)  | 80 (12)  | 79 (9)   | 79 (9)   | 84 (14)               |
| <b>Standing</b>                                     |                 |          |          |          |          |                       |
| Systolic BP, mmHg                                   | 110 (10)        | 111 (10) | 115 (11) | 116 (13) | 114 (10) | 135 (15) <sup>b</sup> |
| Diastolic BP, mmHg                                  | 68 (6)          | 67 (5)   | 69 (8)   | 72 (9)   | 70 (8)   | 80 (9) <sup>b</sup>   |
| Mean BP, mmHg                                       | 82 (7)          | 82 (5)   | 84 (8)   | 87 (10)  | 85 (8)   | 99 (9) <sup>b</sup>   |
| Heart Rate, bpm                                     | 77 (9)          | 81 (11)  | 82 (12)  | 81 (9)   | 80 (8)   | 86 (14)               |
| <b>Systolic BP change Standing vs. Supine, mmHg</b> | 2 (8)           | 0 (6)    | 0 (6)    | 3 (6)    | 2 (6)    | 4 (8)                 |
| Orthostatic Hypotension, N (%) <sup>a</sup>         | 1 (5.6)         | 1 (5.6)  | 0 (0)    | 2 (11.1) | 0 (0)    | 0 (0)                 |
| <b>Treatment-induced Changes</b>                    |                 |          |          |          |          |                       |
| <b>Systolic BP decrease ON vs. OFF standing</b>     | 25 (16)         | 20 (15)  | 20 (15)  | 18 (12)  | 19 (16)  | 1 (5) <sup>b</sup>    |
| <b>Diastolic BP decrease ON vs. OFF standing</b>    | 16 (8)          | 15 (7)   | 14 (7)   | 11 (11)  | 12 (9)   | 3 (6) <sup>b</sup>    |

*Abbreviations:* **BP**, blood pressure; **bpm**, beat per minute; **DDCI**, dopa decarboxylase inhibitor (Benserazide); **Hd**, high dose; **HR**, heart rate; **LD**, Levodopa; **Ld**, Low dose; **MP**, Mucuna pruriens.

\* Data are reported as mean (and standard deviation) or counts [and percentage].

<sup>a</sup> Defined as decrease in systolic blood pressure  $\geq 20$  mmHg or a decrease in diastolic blood pressure  $\geq 10$  mmHg within 3 min of standing (Consensus Committee of the American Autonomic Society and the American Academy of Neurology. Neurology 1996; 46:1470)

<sup>b</sup> Significantly different from all other treatment arms according to t-test for paired data ( $p < 0.05$ )

**Table e-4.** Pharmacokinetic measures and Pharmacodynamic response.

| Features                                 |                            | Patient 1 | Patient 2 | Patient 3 | Patient 4 |
|------------------------------------------|----------------------------|-----------|-----------|-----------|-----------|
| Gender                                   |                            | F         | F         | M         | M         |
| Age (years)                              |                            | 52        | 77        | 54        | 61        |
| Disease duration (years)                 |                            | 10        | 11        | 10        | 24        |
| Body Weight                              |                            | 68        | 40        | 70        | 87        |
| UPDRS part II – Off                      |                            | 12        | 13        | 12        | 17        |
| UPDRS part III – Off                     |                            | 28        | 37        | 28        | 49        |
| Hoehn and Yahr stage – Off               |                            | 3         | 3         | 2.5       | 4         |
| Levodopa daily dose (mg/day)             |                            | 475       | 200       | 400       | 500       |
| Concomitant DA agonists (type, mg/day)   |                            | ROP, 16   | PPX, 0.78 | -         | ROP, 16   |
| Concomitant iMAO-B or iCOMT              |                            | ENT       | -         | ENT       | SEL, ENT  |
| <b>Levodopa plus DDCI</b>                |                            |           |           |           |           |
| Levodopa dose (mg)                       |                            | 100       | 100       | 150       | 250       |
| Weight adjusted levodopa dose (mg/kg)    |                            | 1.5       | 2.5       | 2.1       | 2.9       |
| <i>Motor Response</i>                    | Time to ON, min            | 30        | 15        | 40        | 30        |
|                                          | UPDRS III at 90'           | 11        | 13        | 8         | 13        |
|                                          | Change vs. OFF (%)         | 60.7      | 64.9      | 71.4      | 73.5      |
|                                          | UPDRS III at 180'          | 22        | 9         | 22        | 19        |
|                                          | Change vs. OFF (%)         | 21.4      | 75.7      | 21.4      | 61.2      |
|                                          | Time to Dyskinesias, min   | 53        | 15        | 39        | 30        |
|                                          | AIMS at 90'                | 10        | 23        | 5         | 5         |
|                                          | AIMS at 180'               | 11        | 19        | 0         | 3         |
|                                          | Time to OFF, min           | 220       | 260       | 180       | 200       |
|                                          | ON Duration, min           | 185       | 245       | 140       | 170       |
| <i>Levodopa Pharmacokinetics</i>         | C <sub>max</sub> (µg/mL)   | 0.92      | 1.41      | 0.81      | 2.43      |
|                                          | t <sub>max</sub> (min)     | 45        | 15        | 45        | 15        |
|                                          | AUC (µg/mL) x min          | 55.3      | 94.12     | 102.7     | 156.2     |
| <b>Mucuna Pruriens</b>                   |                            |           |           |           |           |
| MP dose (g)                              |                            | 7         | 9         | 13.5      | 18        |
| Levodopa content in MP (mg) <sup>a</sup> |                            | 399       | 513       | 769       | 1026      |
| Weight-adjusted levodopa content (mg/kg) |                            | 5.9       | 13.0      | 11.0      | 11.8      |
| Levodopa Ratio: MP-to-LD with DDCI       |                            | 4 : 1     | 5 : 1     | 5 : 1     | 4 : 1     |
| <i>Motor Response</i>                    | Time to ON, min            | 15        | 15        | 30        | 15        |
|                                          | - Change vs LD+DDCI, min   | -20       | 0         | -10       | -15       |
|                                          | UPDRS III at 90'           | 8         | 12        | 9         | 17        |
|                                          | Change vs. OFF (%)         | 71.4      | 67.6      | 67.8      | 65.3      |
|                                          | UPDRS III at 180'          | 11        | 9         | 9         | 16        |
|                                          | Change vs. OFF (%)         | 60.7      | 75.7      | 67.8      | 67.3      |
|                                          | Time to Dyskinesias, min   | 15        | 15        | 30        | 21        |
|                                          | AIMS at 90'                | 5         | 22        | 4         | 4         |
|                                          | - Change vs LD+DDCI        | -5        | -1        | -1        | -1        |
|                                          | AIMS at 180'               | 7         | 22        | 7         | 2         |
|                                          | Time to OFF, min           | 220       | 480       | 420       | 240       |
|                                          | ON Duration, min           | 205       | 465       | 390       | 225       |
|                                          | - Change vs LD+DDCI, min   | +20       | +220      | +250      | +55       |
| <i>Levodopa Pharmacokinetics</i>         | C <sub>max</sub> (µg/mL)   | 1.53      | 2.82      | 2.87      | 5.35      |
|                                          | - Change vs LD+DDCI, µg/mL | +0.61     | +1.41     | +2.06     | +2.92     |
|                                          | t <sub>max</sub> (min)     | 30        | 15        | 15        | 15        |
|                                          | - Change vs LD+DDCI, min   | -15       | 0         | -30       | 0         |
|                                          | AUC (µg/mL) x min          | 95.5      | 126.15    | 263.4     | 288       |
|                                          | - Change MP-to-LD+DDCI (%) | +73%      | +34%      | +156%     | +84%      |

**Levodopa without DDCI**

|                                                 |                                |       |                      |         |       |
|-------------------------------------------------|--------------------------------|-------|----------------------|---------|-------|
| Levodopa dose (mg)                              |                                | 400   | 400                  | 600     | 1000  |
| Weight adjusted levodopa dose (mg/kg)           |                                | 5.9   | 10                   | 8.6     | 11.5  |
| Levodopa Ratio: LD without DDCI-to-LD with DDCI |                                | 4 : 1 | 4 : 1                | 4 : 1   | 4 : 1 |
| Levodopa Ratio: LD without DDCI-to-MP           |                                | 1 : 1 | 0.8 : 1              | 0.8 : 1 | 1 : 1 |
| <i>Motor Response</i>                           | Time to ON, min                | 25    | 15                   | 30      | 15    |
|                                                 | - Change vs MP                 | +10   | 0                    | 0       | 0     |
|                                                 | UPDRS III at 90'               | 8     | 19                   | 9       | 18    |
|                                                 | Change vs. OFF (%)             | 71.4  | 48.6                 | 67.8    | 63.3  |
|                                                 | UPDRS III at 180'              | 11    | 23                   | 11      | 19    |
|                                                 | Change vs. OFF (%)             | 60.7  | 37.8                 | 60.7    | 61.2  |
|                                                 | Time to Dyskinesias, min       | 10    | 15                   | 30      | 90    |
|                                                 | AIMS at 90'                    | 4     | 24                   | 4       | 3     |
|                                                 | - Change vs MP                 | -1    | +2                   | 0       | -1    |
|                                                 | AIMS at 180'                   | 7     | 22                   | 6       | 2     |
|                                                 | Time to OFF, min               | 295   | 315                  | 250     | 270   |
|                                                 | ON Duration, min               | 270   | 300                  | 220     | 255   |
|                                                 | - Change vs MP, min            | +65   | -165                 | -170    | +30   |
| <i>Levodopa Pharmacokinetics</i>                | C <sub>max</sub> (µg/mL)       | 1.74  | (1.22) <sup>b</sup>  | 2.1     | 4.27  |
|                                                 | - Change vs MP, µg/mL          | +0.21 | (-1.60) <sup>b</sup> | -0.77   | -1.08 |
|                                                 | t <sub>max</sub> (min)         | 45    | (30) <sup>b</sup>    | 15      | 15    |
|                                                 | - Change vs MP, min            | +15   | (+15) <sup>b</sup>   | 0       | 0     |
|                                                 | AUC (µg/mL) x min              | 149.5 | n.a. <sup>b</sup>    | 231.3   | 347.7 |
|                                                 | - Change MP-to-LD without DDCI | -36%  | n.a. <sup>b</sup>    | +14%    | -17%  |

**Abbreviations:** **AUC**, Area under the plasma concentration-time curve; **C<sub>max</sub>**, peak plasma levodopa concentration; **DDCI**, Dopa decarboxylase inhibitor (i.e. benserazide *or* carbidopa); **LD**, Levodopa; **min**, minutes; **n.a.**, not available; **t<sub>max</sub>**, time to peak plasma levodopa concentration; **UPDRS III**, Unified Parkinson's Disease Rating Scale, motor examination.

<sup>a</sup> Levodopa concentration in MP is 5.7% of roasted seed powder weight (Cassani et al., 2016)

<sup>b</sup> Missing pharmacokinetic data at 45', 60', and 120' due to troublesome dyskinesias and inability of blood sampling.
